# Supplementary material for: Computational insights into steady-state and dynamic Joule-heated reactors
Source: Royal Society of Chemistry journal article supplement (doi:10.1039/d4re00114a), 2024-01-01
Supplement: d4re00114a1.pdf [file d4re00114a1.pdf]

## Supplementary Information

### Computational Insights of Steady-State and Dynamic Joule-Heated Reactors

Arnav Mittal<sup>1</sup>, Marianthi Ierapetritou<sup>1,2</sup>, and Dionisios G. Vlachos<sup>1,2,\*</sup>

<sup>1</sup> Department of Chemical and Biomolecular Engineering, 150 Academy St., University of Delaware, Newark, DE 19716, United States

<sup>2</sup> Delaware Energy Institute, 221 Academy St., University of Delaware, Newark, DE 19716, United States

\*Corresponding author: vlachos@udel.edu

#### POWER DISSIPATED DUE TO RESISTIVE HEATING

Under the assumption of a material being isotropic

$$\frac{1}{2}\varepsilon_0\varepsilon_r E \cdot E = E \cdot \frac{\partial D}{\partial t}$$

By Poynting's theorem

$$E \cdot \frac{\partial D}{\partial t} = J \cdot E$$

Given the electromagnetic constitutive relation,

$$J = \sigma E$$

one gets

$$J \cdot E = \sigma E \cdot E$$

Integrating this over the volume of the element

$$\begin{aligned} \int_V \sigma E \cdot E &= \sigma |E|^2 V_s \\ &= \sigma \left(\frac{V}{L}\right)^2 V_s = \frac{\sigma V^2 L_w L_{th}}{L} \\ &= \left(\frac{\sigma L_w L_{th}}{L}\right) V^2 = \frac{V^2}{R} \end{aligned}$$

$$\text{Grasshof number} = Gr = \frac{g\beta(T_s - T_\infty)L^3}{\vartheta^2} \quad (\text{S1})$$

$$\text{Reynolds number} = Re = \frac{\rho UL}{\mu} = \text{Interfacial forces} / \text{Inertial forces} \quad (\text{S2})$$

$$Pr = \frac{C_p \mu}{k} = \text{momentum diffusivity} / \text{thermal diffusivity} \quad (\text{S3})$$

$$Ra = \text{Rayleigh number} = Gr_x Pr = \frac{\rho\beta\Delta T x^3 g}{\mu\alpha} \quad (\text{S4})$$

$g$  is gravity,  $\beta$  is the expansion coefficient,  $L$  is the length of the element,  $\vartheta$  is the kinetic viscosity,  $\rho$  is the density,  $U$  is the velocity,  $\mu$  is the dynamic viscosity,  $C_p$  is the heat capacity, and  $k$  is the thermal conductivity.

| <b>Experimental condition</b>         | <b>Experimental value</b> | <b>CFD value</b> |
|---------------------------------------|---------------------------|------------------|
| Steady state temperature at 30 V      | 1922 K                    | 1790.2 K         |
| Steady state current – 12.4 V         | 3.8 A                     | 4.075 A          |
| Steady state current – 14 V           | 4.61 A                    | 4.5 A            |
| Steady state current – 15 V           | 5.25 A                    | 5.3 A            |
| Peak of pulsing temperature – 50 V    | 1473 K                    | 1479.7 K         |
| Minimum of pulsing temperature – 50 V | 773 K                     | 716.3 K          |

Table S1: Experimental validation of CFD model.

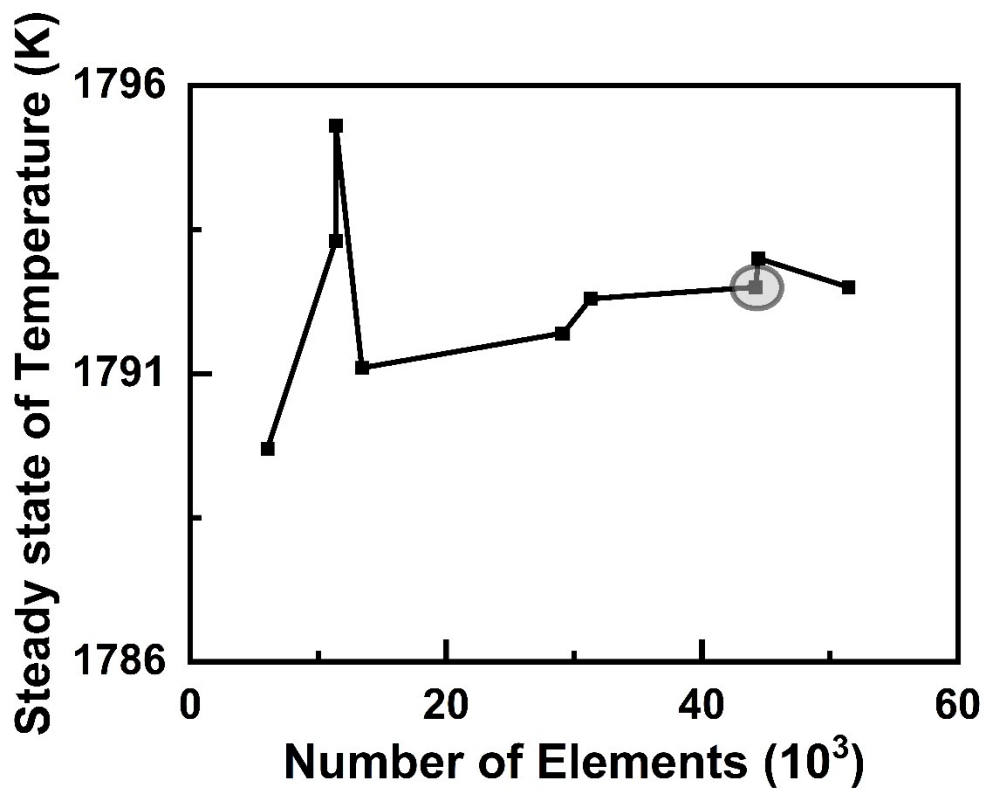

Figure S1: Mesh dependency study showing the steady state temperature for 30 V, with *He* flowing at 90 mL/min vs. the number of elements in the mesh. Highlighted mesh configuration used in this study.

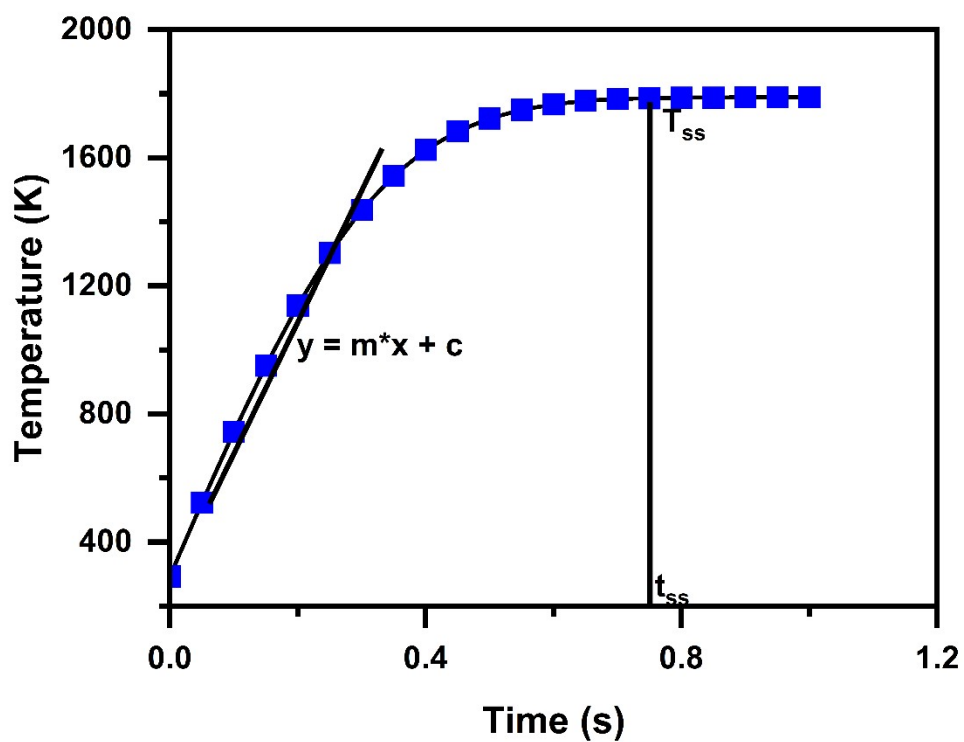

Figure S2: Temperature of the element vs. time. ( $T_{e,ss}$  = temperature at steady state,  $t_{ss}$  = time to steady state, and  $m = R_h$  = temperature ramp rate). Voltage of 30 V with a *He* inlet flow of 90 mL/min.

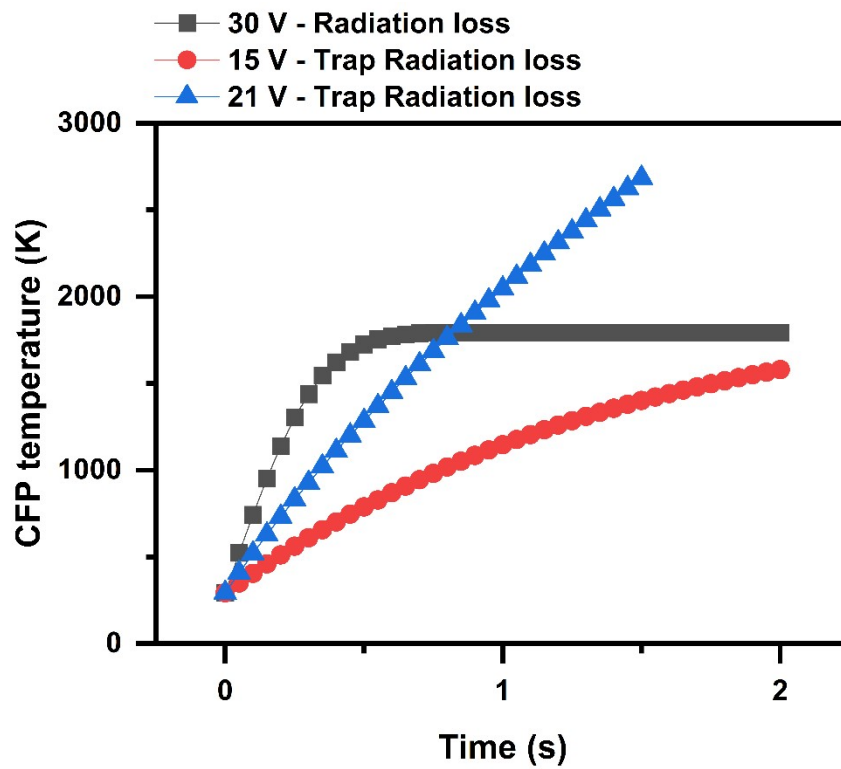

Figure S3: Impact of trapping radiation using a completely reflective surface over quartz tube on the temperature.

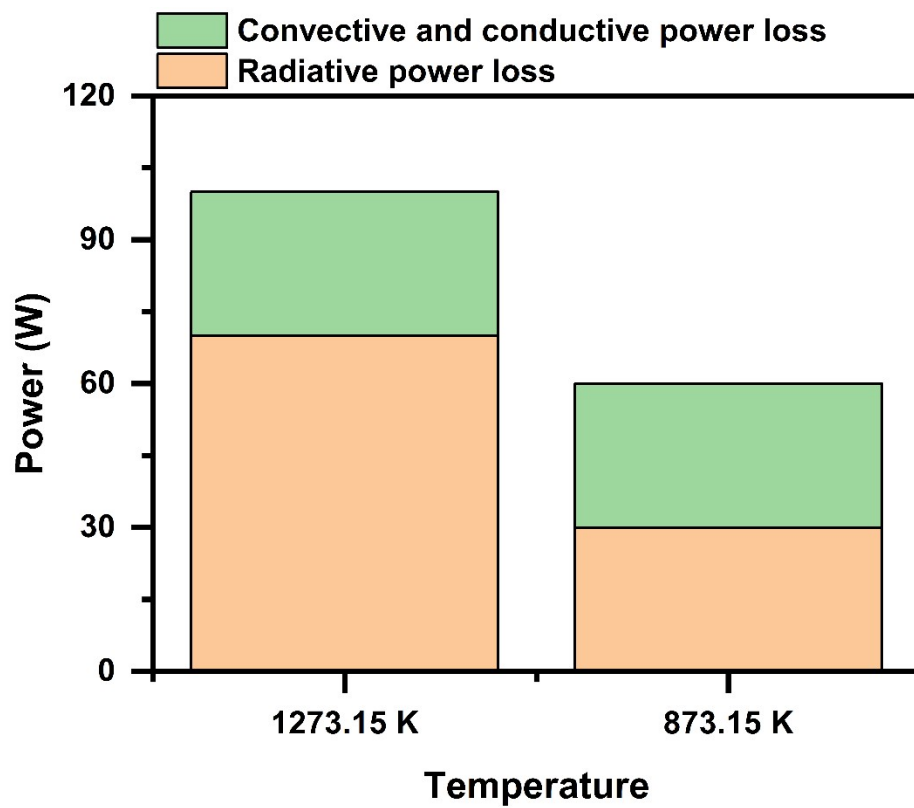

Figure S4: Power loss contributions when  $(T_{e,ss}^-) = 1000\text{ }^\circ\text{C}$  and  $600\text{ }^\circ\text{C}$ , using  $N_2$  at  $90\text{ mL/min}$ .

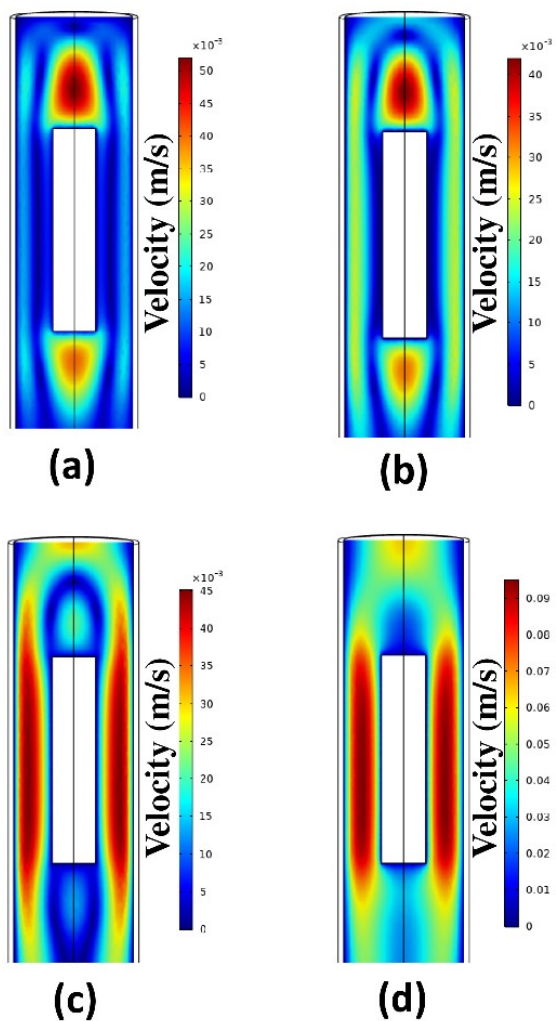

Figure S5: Flow maps of the magnitude of velocity parallel to the element at steady state for 30 V applied with He flowing at (a) 90 mL/min, (b) 180 mL/min, (c) 360 mL/min, and (d) 720 mL/min.

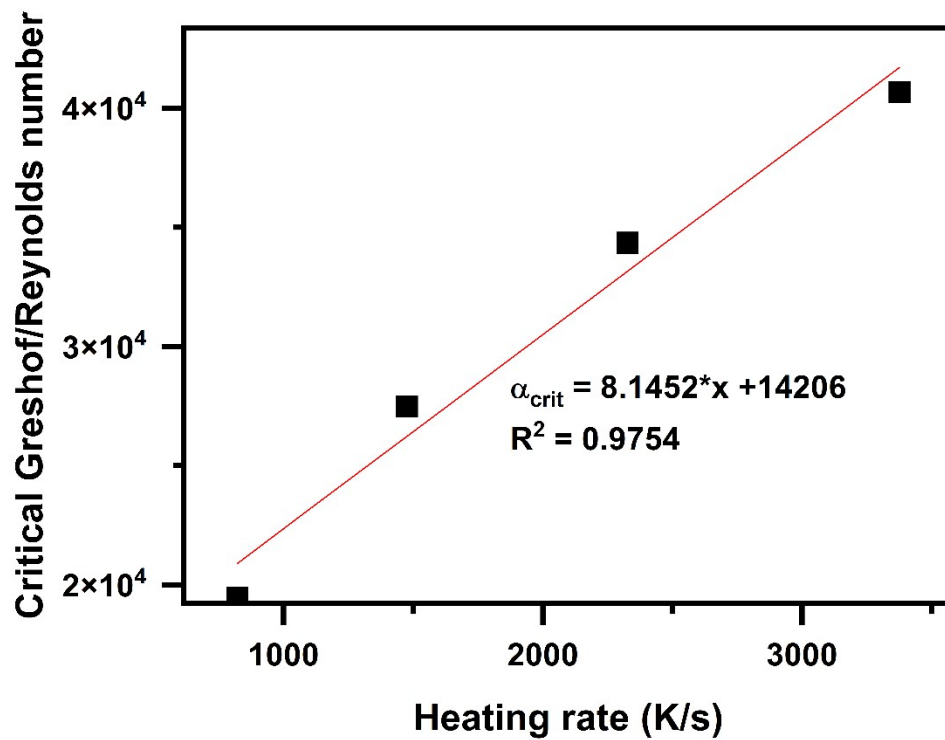

Figure S6: Variation of the critical value for reverse flow with heating rate.



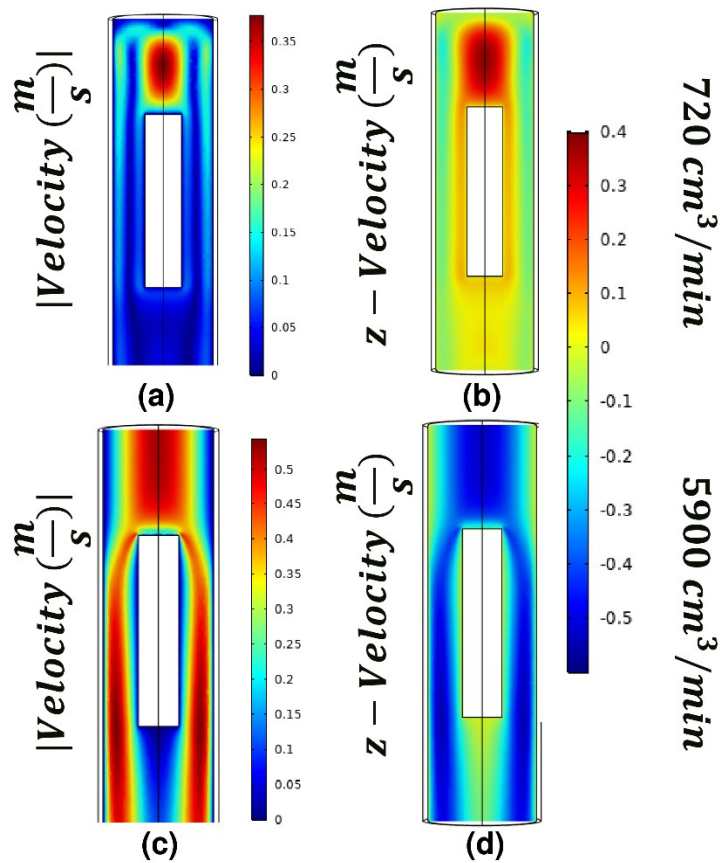

Figure S7: Flow maps of the magnitude and axial velocity for  $N_2$  for 30 V applied to CFP. (a) Magnitude at 720 mL/min. (b) Axial velocity at 720 mL/min. (c) Magnitude at 5900 mL/min. (d) Axial component at 5900 mL/min.

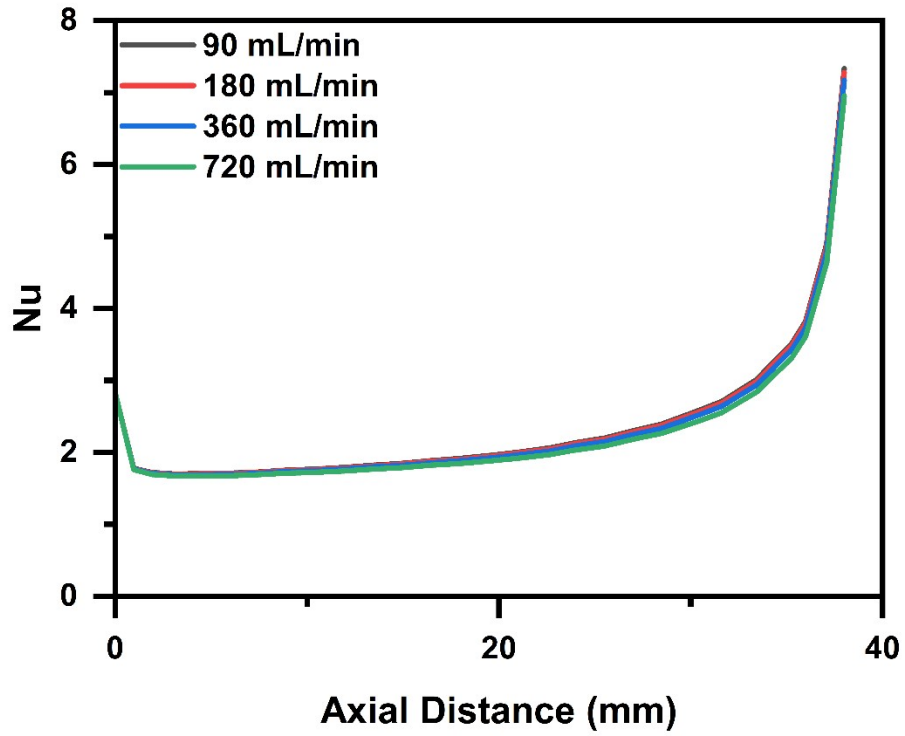

Figure S8: Impact of inlet flow rate at steady state for 30 V applied to CFP on the Nu number vs. distance from the leading edge of the heating element (assuming incompressibility).

**HEATING TIME SCALE & STEADY STATE TEMPERATURE DERIVATION  
AT LOW TEMPERATURES (Temperature range I)**

$$\begin{aligned}\frac{d\theta}{d\tau} &= \alpha - \beta * (\theta - 1) \\ \frac{d\theta}{\alpha - \beta * (\theta - 1)} &= d\tau \\ \log\left(\frac{\alpha - \beta(\theta - 1)}{\alpha}\right) &= -\beta\tau \\ t_H &= \frac{t_0}{\beta}\end{aligned}$$

For steady state:  $\frac{d\theta}{d\tau} = 0$   
 $\alpha - \beta * (\theta - 1) = 0$   
 $\frac{\alpha}{\beta} + 1 = \theta_{ss}$

**HIGH TEMPERATURES (Temperature range II-IV)**

$$\begin{aligned}\frac{d\theta}{d\tau} &= \alpha - \gamma * (\theta^4 - 1) \\ \frac{d\theta}{\alpha - \gamma * (\theta^4 - 1)} &= d\tau \\ \frac{d\theta}{\alpha + \gamma - \gamma\theta^4} &= \\ \frac{d\theta}{A - \gamma\theta^4} &= \frac{0.5A^{-0.5}d\theta}{A^{0.5} + \gamma^{0.5}\theta^2} + \frac{0.25A^{-0.75}d\theta}{A^{0.25} + \gamma^{0.25}\theta} + \frac{0.25A^{-0.75}d\theta}{A^{0.25} - \gamma^{0.25}\theta} \\ &= \frac{1}{4A^{0.75}\gamma^{0.25}}(\log(A^{0.25} + \gamma^{0.25}\theta) - \log(A^{0.25} - \gamma^{0.25}\theta) + \tan^{-1}\left(\frac{\gamma^{0.25}}{A^{0.25}}\theta\right)) \\ A = \alpha + \gamma &\gg \gamma, \tan^{-1}\left(\frac{\gamma^{0.25}}{A^{0.25}}\theta\right) \sim 0\end{aligned}$$

Putting in limits, the RHS becomes

$$\tau(4A^{0.75}\gamma^{0.25}) = \log\left(\frac{A^{0.25} + \gamma^{0.25}\theta}{A^{0.25} - \gamma^{0.25}\theta}\right) - \log\left(\frac{A^{0.25} + \gamma^{0.25}}{A^{0.25} - \gamma^{0.25}}\right)$$

$$\frac{A^{0.25} + \gamma^{0.25}}{A^{0.25} - \gamma^{0.25}} \exp(\tau(4A^{0.75}\gamma^{0.25})) = \frac{A^{0.25} + \gamma^{0.25}\theta}{A^{0.25} - \gamma^{0.25}\theta}$$

The exponential term can be written as the ratio of time and heating timescale.

$$t_H = \frac{t_0}{4(\alpha + \gamma)^{\frac{3}{4}}\gamma^{\frac{1}{4}}}$$

At steady state:  $\frac{d\theta}{d\tau} = 0$

$$0 = \alpha - \gamma * (\theta^4 - 1)$$

$$\left(\frac{\alpha}{\gamma} + 1\right)^{0.25} = \theta_{ss}$$

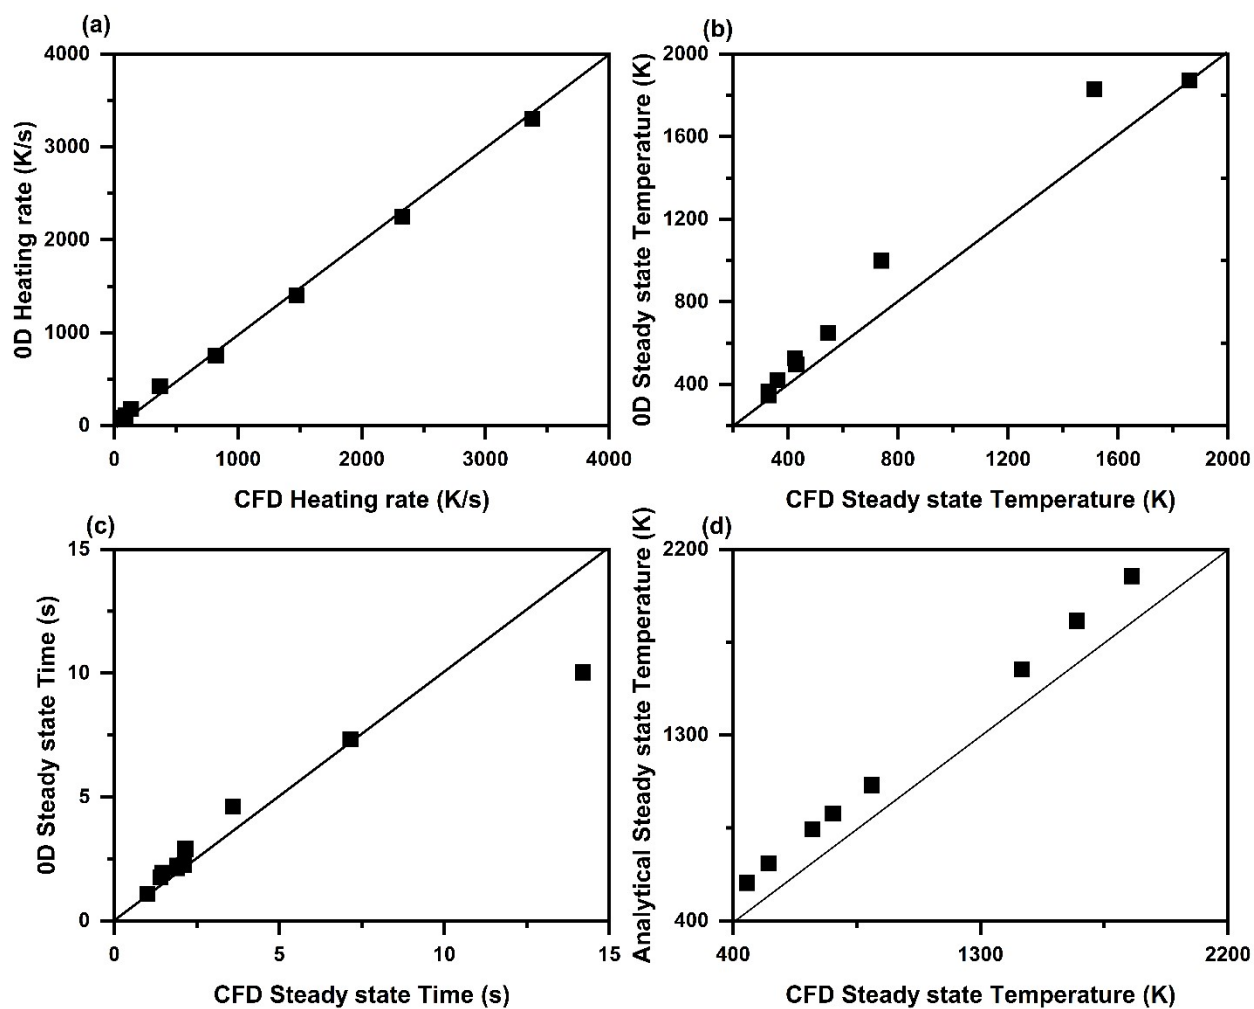

Figure S9: Parity plots of 0D predicted vs. CFD. (a) Heating rate, (b) temperature at steady state, (c) time to steady state, and (d) temperature. (Voltage applied to CFP = 2-30 V,  $L = 38$  mm,  $L_{th} = 0.21$  mm,  $L_w = 8$  mm, He flowing at 90 ml/min).

## COMPARISON BETWEEN GAS AND LIQUID

We consider water and Helium (He). Assuming similar setup, CFP at  $T_{e,ss} = 90\text{ }^{\circ}\text{C}$ , a quartz tube with  $r = 11\text{ mm}$ .

Table S2: Material properties for water and He (at  $20\text{ }^{\circ}\text{C}$ ).

|                             | <b>Water[48]</b>            | <b>Helium</b>              |
|-----------------------------|-----------------------------|----------------------------|
| <b>Flow rate</b>            | 30 mL/min – 1000 mL/min[45] | 90 sccm[18]                |
| <b>Density</b>              | 1000 kg/m <sup>3</sup>      | 0.16                       |
| <b>Viscosity</b>            | 0.001 Pa*s                  | $1.95 \times 10^{-5}$ Pa*s |
| <b>Thermal conductivity</b> | 0.6 W/(m*K)                 | 0.15 W/(m*K)               |
| <b>Heat capacity</b>        | 4180 J/(kg*K)               | 5195 J/(kg*K)              |

Table S2: Material properties for water and He (at  $20\text{ }^{\circ}\text{C}$ ).

Based on the material properties and the flow rate, an empirical correlation is used and the results are shown below.

|                                                      | <b>Water</b>                              | <b>Helium</b>                 |
|------------------------------------------------------|-------------------------------------------|-------------------------------|
| <b>Reynolds number (Re)</b>                          | 50 - 1700                                 | 0.86                          |
| <b>Richardson Number (Ri)</b>                        | $0.0001 - 0.07 < 0.1$ , forced convection | $134 > 0.1$ , free convection |
| <b>Empirical correlation for Nusselt number (Nu)</b> | $0.663Re^{0.5}Pr^{0.33}$                  | Eq. 12                        |
| <b>Nu</b>                                            | 10-53                                     | 4                             |

Table S3: Empirical correlations used and results.

For water flow rate  $< 30\text{ mL/min}$ ,  $Ri > 0.1$ , characteristic of free convection. Eq. 12 can be used

for water in this case and  $Nu \sim 52$ .  $Pe < 0.3$ , hence  $\frac{Nu}{Pe}$  is an order of magnitude higher as compared to gases, making  $\beta$  much larger for liquids.

### HEATING TIME SCALE FOR THE GAS

Our results show only a minute fraction of the electric heating gets transferred to the gas. To capture the influence of physical properties on the gas outlet temperature (Figure 3), we propose Eq. S5, to calculate  $t_{eh}$

$$t_{eh} = \frac{\rho_g C_{p,g} V_s (T_{e,ss} - T_a)}{hA(T_{e,ss} - T_a)} \sim \frac{\rho_g C_{p,g} LL_{th}}{\kappa Nu_L} \sim \frac{LL_{th}}{a Nu_L} \quad (S5)$$

Here  $a$  is the thermal diffusivity of the system.  $h$  can be predicted using Eq. 16, and this allows Eq. S5 to capture all important gas properties. Eq. S5 assumes that the time constant for a gas film of the same volume as the element to reach  $T_{e,ss}$  (gas film is in thermal equilibrium with the element). For instance, *He* flowing with an inlet flow rate of 720 mL/min over the carbon element has  $t_{eh} \sim 0.03$  s, which is much smaller than  $t_0$  ( $\sim 1$  s) allowing sufficient time to heat up the gas near the element. *Balakotaiah and Ratnakar*<sup>40</sup> also propose a gas heating time scale from the power generated by Joule heating. Figure 3 indicates that under certain conditions, such as ours, only a fraction of the generated power is absorbed by the gas; most heat is lost directly by radiation.

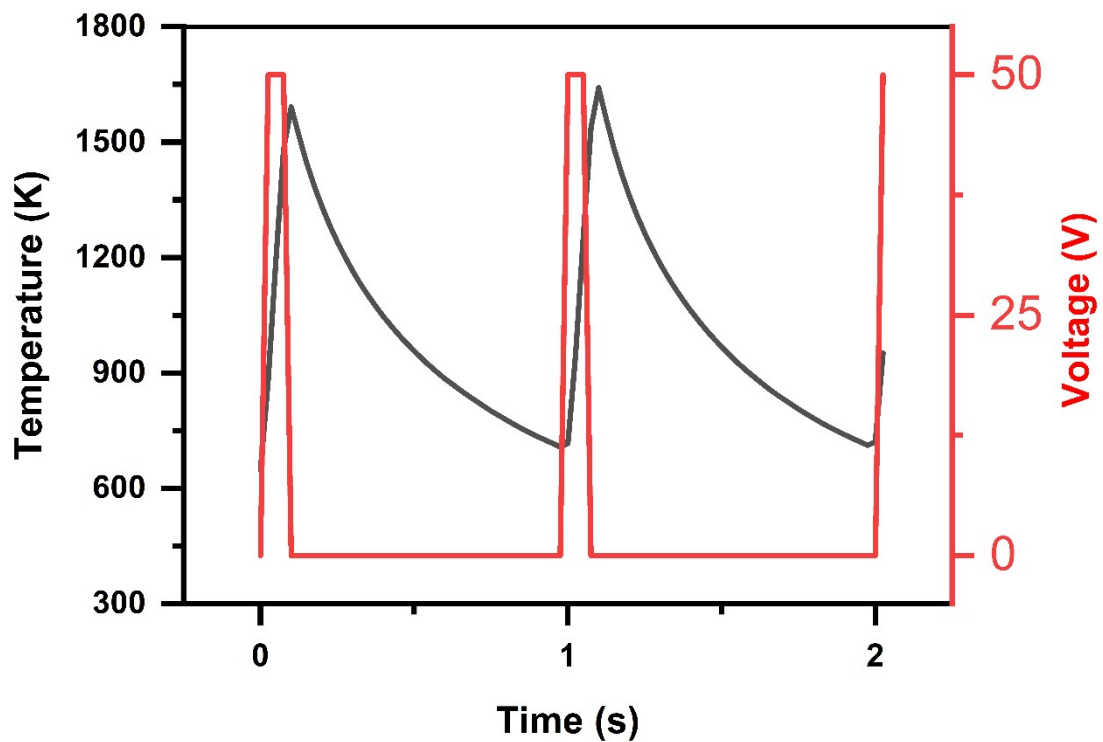

Figure S10: Temperature profile outcome for the voltage profile applied to the CFP element (50 V applied for 50 ms and 950 ms of cooling time).



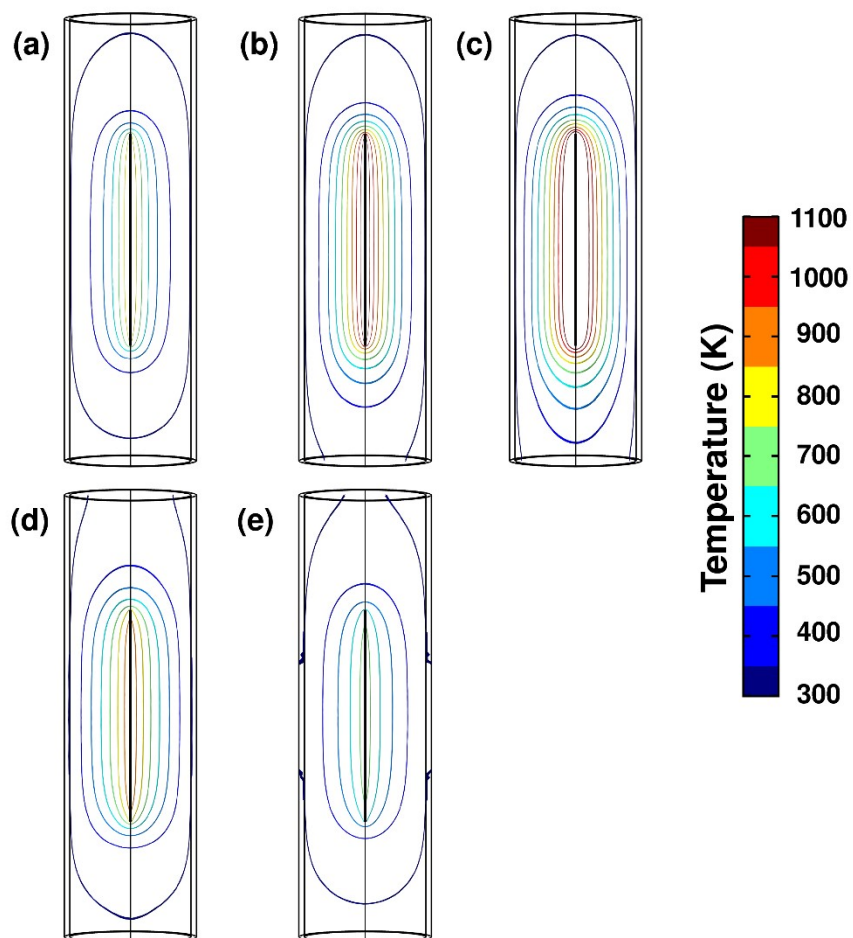

Figure S11: Temperature contours in the ZX plane at various times of one pulse of 50 V for 50 ms heating and 950 ms cooling with a *He* inlet flow rate of 90mL/min. (a) Heating starts, (b) heating in the middle, (c) heating stops, (d) middle of cooling, and (e) cooling stops.

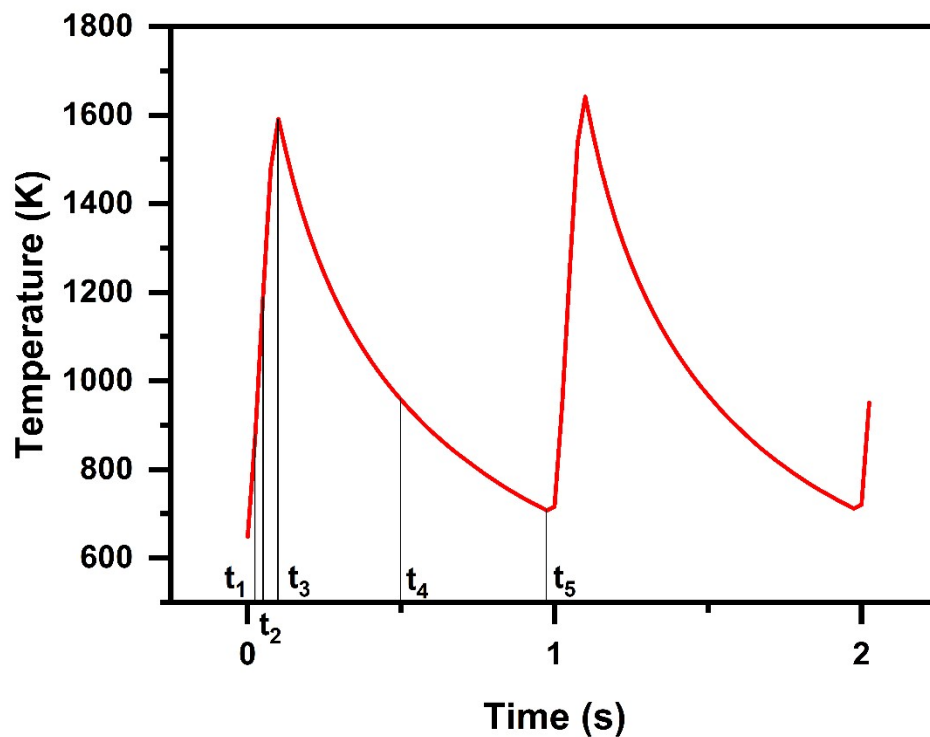

Figure S12: Temperature profile for 50 V applied for 50 ms and turned off for 950 ms.  $t_1$  = heating starts,  $t_2$  = heating middle,  $t_3$  = heating stops,  $t_4$  = cooling middle, and  $t_5$  = cooling stops.

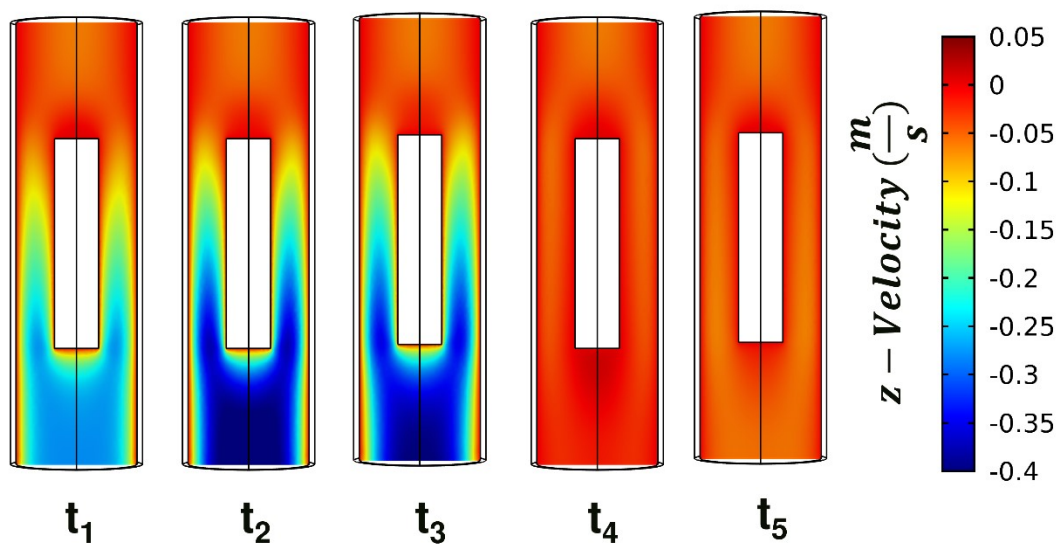

Figure S13: Axial velocity of *He* flowing in at 720 mL/min along various times of a pulse of 50 ms of 50 V applied and 950 ms of cooling.

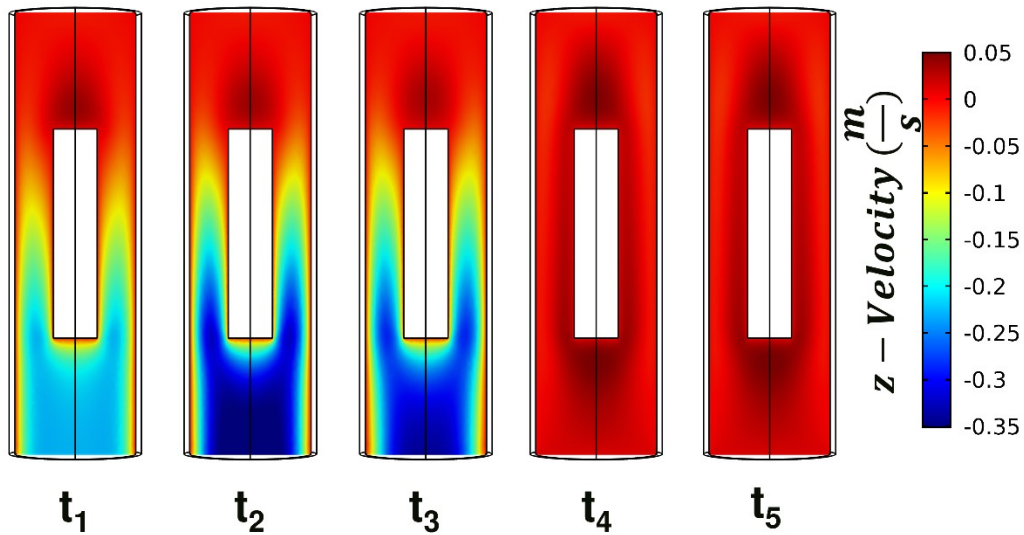

Figure S14: Axial velocity of *He* flowing in at 90 mL/min along various times of a pulse of 50 ms of 50 V applied and 950 ms of cooling.

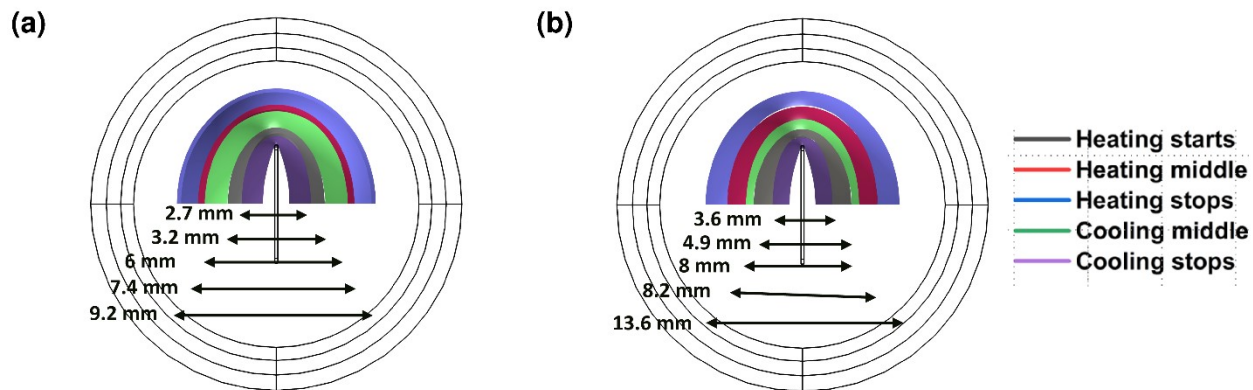

Figure S15: 600 K isothermal contours at various times of one pulse of 50 V applied for 90 ms and 950 ms of cooling with *He* flowing at (a) 90 mL/min and (b) 720 mL/min.
